# Supplementary material
Source: publisher figshare collection journal article supplement (https://tandf.figshare.com/articles/dataset/_/1244997)
Supplement: Supplementary file 1 [file 4]

Appendix II. Mean cover percent values and frequency classes of species recorded in 40 vegetational relevés (10 m x 10 m), 20 in mown and 20 in abandoned meadows. Nomenclature follows Conti et al. (2005).

| Species                                                                          | Mown meadows   |             | Abandoned meadows |             |
|----------------------------------------------------------------------------------|----------------|-------------|-------------------|-------------|
|                                                                                  | Mean cover (%) | Freq. class | Mean cover (%)    | Freq. class |
| <i>Achillea millefolium</i> L.                                                   | 0.18           | II          | 0.08              | I           |
| <i>Acinos alpinus</i> (L.) Moench subsp. <i>alpinus</i>                          | 0.05           | I           | -                 | -           |
| <i>Agrostis capillaris</i> L.                                                    | 6.65           | V           | 21.50             | V           |
| <i>Ajuga reptans</i> L.                                                          | 0.05           | I           | 0.29              | III         |
| <i>Alchemilla glaucescens</i> Wallr.                                             | 0.11           | II          | 1.83              | V           |
| <i>Allium vineale</i> L.                                                         | 0.07           | I           | -                 | -           |
| <i>Anemone ranunculoides</i> L.                                                  | 0.02           | I           | -                 | -           |
| <i>Anthoxanthum odoratum</i> L. subsp. <i>odoratum</i>                           | 2.73           | V           | 1.21              | IV          |
| <i>Anthyllis vulneraria</i> L. subsp. <i>weldeniana</i> (Rchb.) Cullen           | 0.09           | I           | -                 | -           |
| <i>Arabis hirsuta</i> (L.) Scop.                                                 | 0.55           | IV          | 0.04              | I           |
| <i>Armeria canescens</i> (Host) Ebel                                             | 0.23           | III         | 0.33              | IV          |
| <i>Asperula cynanchica</i> L.                                                    | 0.34           | IV          | 0.13              | I           |
| <i>Asperula purpurea</i> (L.) Ehrend. subsp. <i>purpurea</i>                     | 0.23           | II          | -                 | -           |
| <i>Avenula praetutiana</i> (Parl. ex Arcang.) Pignatti                           | 1.64           | IV          | 0.04              | I           |
| <i>Bellardiochloa variegata</i> (Lam.) Kerguelen                                 | 0.32           | V           | 0.13              | I           |
| <i>Bellis perennis</i> L.                                                        | 0.07           | I           | 0.04              | I           |
| <i>Biscutella laevigata</i> L. subsp. <i>laevigata</i>                           | 0.07           | I           | -                 | -           |
| <i>Botrychium lunaria</i> (L.) Sw.                                               | 0.02           | I           | 0.08              | I           |
| <i>Brachypodium genuense</i> (DC.) Roem. et Schult.                              | 28.75          | V           | 88.75             | V           |
| <i>Brachypodium rupestre</i> (Host) Roem. et Schult.                             | 0.07           | I           | 0.04              | I           |
| <i>Briza media</i> L.                                                            | 1.08           | III         | 0.42              | III         |
| <i>Bromus erectus</i> Huds. subsp. <i>erectus</i>                                | 27.50          | V           | 12.85             | V           |
| <i>Bunium bulbocastanum</i> L.                                                   | 0.05           | I           | -                 | -           |
| <i>Campanula glomerata</i> L.                                                    | 1.05           | V           | 2.58              | V           |
| <i>Campanula micrantha</i> Bertol.                                               | 1.13           | V           | 8.00              | V           |
| <i>Carex caryophyllaea</i> Latourr.                                              | 0.50           | III         | 0.04              | I           |
| <i>Carex macrolepis</i> DC.                                                      | 2.09           | III         | 4.71              | V           |
| <i>Carlina acaulis</i> L. subsp. <i>caulescens</i> (Lam.) Schubl. et G. Martens  | -              | -           | 0.17              | II          |
| <i>Cerastium arvense</i> L. subsp. <i>suffruticosum</i> (L.) Ces.                | 5.02           | V           | 0.88              | V           |
| <i>Crocus vernus</i> (L.) Hill subsp. <i>vernus</i>                              | 0.77           | III         | 0.54              | III         |
| <i>Cruciata glabra</i> (L.) Ehrend. subsp. <i>glabra</i>                         | 0.02           | I           | 1.25              | IV          |
| <i>Cruciata laevipes</i> Opiz                                                    | -              | -           | 0.04              | I           |
| <i>Cyanus triumfetti</i> (All.) Dostál ex Á. et D. Löve                          | 1.34           | V           | 0.46              | III         |
| <i>Cynosurus cristatus</i> L.                                                    | 1.10           | IV          | 0.13              | II          |
| <i>Cytisus hirsutus</i> L. subsp. <i>polytrichus</i> (M. Bieb.) Hayek            | 0.09           | I           | 0.08              | I           |
| <i>Dactylis glomerata</i> L. subsp. <i>glomerata</i>                             | -              | -           | 0.46              | III         |
| <i>Dactylorhiza sambucina</i> (L.) Soó                                           | 1.08           | V           | 0.67              | V           |
| <i>Danthonia alpina</i> Vest                                                     | 0.09           | I           | -                 | -           |
| <i>Danthonia decumbens</i> (L.) DC. subsp. <i>decumbens</i>                      | 0.05           | I           | -                 | -           |
| <i>Deschampsia flexuosa</i> (L.) Trin. subsp. <i>flexuosa</i>                    | 0.05           | I           | 0.38              | II          |
| <i>Dianthus carthusianorum</i> L. subsp. <i>tenorei</i> (Lacaita) Pignatti       | 0.07           | I           | 0.08              | I           |
| <i>Dianthus monspessulanus</i> L.                                                | 1.18           | V           | 1.54              | V           |
| <i>Festuca circummediterranea</i> Patzke                                         | 2.55           | V           | 3.88              | V           |
| <i>Festuca rubra</i> L. subsp. <i>commutata</i> (Gaudin) Markgr.-Dann.           | 3.23           | II          | 18.75             | V           |
| <i>Filipendula vulgaris</i> Moench                                               | 3.05           | V           | 7.50              | V           |
| <i>Galium anisophyllum</i> Vill.                                                 | 0.60           | II          | 0.88              | V           |
| <i>Galium corrudifolium</i> Vill.                                                | 0.32           | IV          | 0.17              | II          |
| <i>Galium verum</i> L. subsp. <i>verum</i>                                       | 2.45           | IV          | 5.58              | IV          |
| <i>Gentiana lutea</i> L. subsp. <i>lutea</i>                                     | 1.08           | III         | 0.29              | III         |
| <i>Gentiana verna</i> L. subsp. <i>verna</i>                                     | 0.16           | II          | 0.04              | I           |
| <i>Gymnadenia conopsea</i> (L.) R. Br.                                           | 0.14           | II          | 0.38              | IV          |
| <i>Helleborus bocconeii</i> Ten. subsp. <i>bocconeii</i>                         | 0.23           | III         | 0.04              | I           |
| <i>Helianthemum nummularium</i> (L.) Mill. subsp. <i>obscurum</i> (Celak.) Holub | 0.05           | I           | 0.25              | III         |
| <i>Hieracium cymosum</i> L.                                                      | 0.32           | I           | 0.67              | V           |
| <i>Hieracium pilosella</i> L.                                                    | 0.50           | III         | -                 | -           |
| <i>Hypericum perforatum</i> L. s.l.                                              | 0.45           | II          | 1.88              | III         |
| <i>Knautia purpurea</i> (Vill.) Borbás                                           | 2.07           | V           | 2.08              | V           |
| <i>Koeleria lobata</i> (M. Bieb.) Roem. et Schult.                               | 0.88           | I           | 0.08              | I           |
| <i>Lathyrus pratensis</i> L.                                                     | -              | -           | 0.17              | II          |
| <i>Leontodon cichoraceus</i> (Ten.) Sanguin.                                     | 0.05           | I           | 0.33              | IV          |
| <i>Leontodon hispidus</i> L.                                                     | 0.27           | I           | 0.67              | III         |
| <i>Leucanthemum adustum</i> (W.D.J. Koch) Gremli                                 | 0.18           | II          | 0.54              | IV          |
| <i>Lilium bulbiferum</i> L. subsp. <i>croceum</i> (Chaix) Jan                    | 0.07           | I           | 0.08              | I           |
| <i>Linum alpinum</i> Jacq.                                                       | 0.36           | II          | -                 | -           |
| <i>Linum catharticum</i> L. subsp. <i>catharticum</i>                            | 0.02           | I           | -                 | -           |
| <i>Lotus corniculatus</i> L. subsp. <i>corniculatus</i>                          | 1.52           | V           | 10.00             | V           |
| <i>Luzula campestris</i> (L.) DC.                                                | 1.32           | V           | -                 | -           |
| <i>Luzula multiflora</i> (Ehrh.) Lej.                                            | 1.45           | I           | 0.04              | I           |
| <i>Luzula sylvatica</i> (Huds.) Gaudin subsp. <i>sieberi</i> (Tausch) K. Richt   | 1.00           | II          | 0.50              | III         |
| <i>Minuartia verna</i> (L.) Hiern subsp. <i>collina</i> (Neilr.) Domin           | 0.09           | I           | -                 | -           |
| <i>Myosotis alpestris</i> F. W. Schmidt                                          | 0.14           | II          | 0.04              | I           |
| <i>Myosotis arvensis</i> (L.) Hill subsp. <i>arvensis</i>                        | -              | -           | 0.04              | I           |
| <i>Narcissus poeticus</i> L.                                                     | 0.27           | III         | 1.67              | V           |
| <i>Nardus stricta</i> L.                                                         | 1.37           | V           | 1.29              | I           |
| <i>Orchis mascula</i> (L.) L. subsp. <i>mascula</i>                              | 0.14           | II          | 0.08              | I           |
| <i>Paeonia officinalis</i> L. subsp. <i>italica</i> N.G. Passal. et Bernardo     | 1.43           | II          | 0.04              | I           |
| <i>Pedicularis tuberosa</i> L.                                                   | 0.09           | I           | 0.29              | III         |
| <i>Phyteuma orbiculare</i> L.                                                    | -              | -           | 0.17              | II          |
| <i>Plantago argentea</i> Chaix                                                   | 0.77           | IV          | 0.58              | IV          |

|                                                                                                    |      |     |      |     |
|----------------------------------------------------------------------------------------------------|------|-----|------|-----|
| <i>Plantago atrata</i> Hoppe subsp. <i>atrata</i>                                                  | 0.14 | II  | 0.18 | II  |
| <i>Plantago lanceolata</i> L.                                                                      | 0.78 | IV  | 0.25 | III |
| <i>Plantago media</i> L. subsp. <i>media</i>                                                       | 0.14 | II  | -    | -   |
| <i>Poa alpina</i> L. subsp. <i>alpina</i>                                                          | 0.09 | I   | 0.17 | II  |
| <i>Poa bulbosa</i> L.                                                                              | 0.05 | I   | -    | -   |
| <i>Poa molinerii</i> Balb.                                                                         | -    | -   | 0.04 | I   |
| <i>Poa trivialis</i> L.                                                                            | -    | -   | 0.04 | I   |
| <i>Polygala alpestris</i> Rchb.                                                                    | 0.18 | II  | 0.17 | II  |
| <i>Potentilla rigoana</i> Th. Wolf                                                                 | 1.27 | IV  | 0.29 | III |
| <i>Primula veris</i> L. subsp. <i>suaveolens</i> (Bertol.) Gutermann et Ehrend.                    | 0.11 | II  | 0.13 | I   |
| <i>Ranunculus apenninus</i> (Chiov.) Pignatti                                                      | 0.09 | I   | 0.09 | I   |
| <i>Ranunculus breyninus</i> Crantz                                                                 | 0.11 | II  | 0.50 | III |
| <i>Ranunculus ficaria</i> L. subsp. <i>ficaria</i>                                                 | -    | -   | 0.02 | I   |
| <i>Ranunculus pollinensis</i> (N. Terracc.) Chiov.                                                 | 1.12 | IV  | 1.67 | V   |
| <i>Rhinanthus minor</i> L.                                                                         | 0.85 | III | -    | -   |
| <i>Rhinanthus wettsteini</i> (Sterneck) Soó                                                        | 0.18 | II  | -    | -   |
| <i>Rumex acetosa</i> L. subsp. <i>acetosa</i>                                                      | 0.16 | II  | 0.92 | V   |
| <i>Rumex nebroides</i> Campd.                                                                      | 0.11 | II  | 0.46 | III |
| <i>Sanguisorba minor</i> Scop. subsp. <i>balearica</i> (Bourg. ex Nyman) Muñoz Garm. et C. Navarro | 1.41 | I   | -    | -   |
| <i>Saxifraga bulbifera</i> L.                                                                      | 0.11 | II  | 0.17 | II  |
| <i>Scilla bifolia</i> L.                                                                           | 0.01 | I   | 0.01 | I   |
| <i>Sedum sexangulare</i> L.                                                                        | 0.20 | III | -    | -   |
| <i>Sedum rupestre</i> L. subsp. <i>rupestre</i>                                                    | 0.32 | IV  | 0.13 | II  |
| <i>Senecio doronicum</i> (L.) L.                                                                   | 0.11 | II  | -    | -   |
| <i>Senecio provincialis</i> (L.) Druce                                                             | 0.05 | I   | -    | -   |
| <i>Senecio scopolii</i> Hoppe et Hornsch. ex Bluff et Fingerh.                                     | 1.12 | IV  | 9.45 | V   |
| <i>Silene ciliata</i> Pourr. subsp. <i>graefferi</i> (Guss.) Nyman                                 | 0.09 | I   | 0.08 | I   |
| <i>Stachys officinalis</i> (L.) Trevis.                                                            | 1.05 | IV  | 0.21 | III |
| <i>Thesium linophyllum</i> L.                                                                      | 0.41 | I   | 0.42 | III |
| <i>Thymus longicaulis</i> C. Presl subsp. <i>longicaulis</i>                                       | 2.33 | IV  | 0.29 | III |
| <i>Tragopogon pratensis</i> L. subsp. <i>pratensis</i>                                             | 0.18 | II  | 0.27 | V   |
| <i>Trifolium alpestre</i> L.                                                                       | 1.10 | V   | 1.63 | IV  |
| <i>Trifolium montanum</i> L. subsp. <i>rupestre</i> (Ten.) Pignatti                                | 3.95 | V   | 3.08 | V   |
| <i>Trifolium ochroleucum</i> Huds.                                                                 | 0.27 | III | 0.08 | I   |
| <i>Trifolium pratense</i> L. subsp. <i>pratense</i>                                                | 0.14 | II  | 0.29 | III |
| <i>Valeriana tuberosa</i> L.                                                                       | 0.05 | I   | -    | -   |
| <i>Veronica officinalis</i> L.                                                                     | -    | -   | 0.25 | III |
| <i>Veronica orsiniana</i> Ten. subsp. <i>orsiniana</i>                                             | 0.11 | II  | 0.04 | I   |
| <i>Vicia cracca</i> L.                                                                             | -    | -   | 0.13 | II  |
| <i>Viola eugeniae</i> Parl. subsp. <i>eugeniae</i>                                                 | 0.23 | III | 0.42 | III |

## Reference

Conti F, Abbate G, Alessandrini A, Blasi C (editors). 2005. An Annotated Checklist of the Italian Vascular Flora. Ministero dell'Ambiente e della Tutela del Territorio, Dipartimento di Biologia Vegetale, Università degli Studi di Roma "La Sapienza". Palombi Editori, Roma, 420 p.
