# Supplementary material
Source: publisher figshare collection journal article supplement (https://tandf.figshare.com/articles/dataset/_/1244997)
Supplement: Supplementary file 2 [file 4]

Archive with 3 entries (3 files):
- Appendix II.pdf
- Appendix III.pdf
- Appendix I.pdf
