# Supplementary material
Source: publisher figshare collection journal article supplement (https://tandf.figshare.com/articles/dataset/_/1244997)
Supplement: Supplementary file 2 [file 4 › Appendix III.pdf]

Appendix III. Average percentage of flowering shoots occurring at each time (t<sub>1-5</sub>) for species sharing a coenological role/trait state ( $F_{av,t} \times 100$ ) in mown and abandoned meadows.

|                                     |                                                                                            | Mown meadows   |                |                |                |                | Abandoned meadows |                |                |                |                |
|-------------------------------------|--------------------------------------------------------------------------------------------|----------------|----------------|----------------|----------------|----------------|-------------------|----------------|----------------|----------------|----------------|
| Coenological role of species        |                                                                                            | t <sub>1</sub> | t <sub>2</sub> | t <sub>3</sub> | t <sub>4</sub> | t <sub>5</sub> | t <sub>1</sub>    | t <sub>2</sub> | t <sub>3</sub> | t <sub>4</sub> | t <sub>5</sub> |
| accidental                          |                                                                                            | 7              | 39             | 33             | 8              | 12             | 8                 | 27             | 38             | 15             | 12             |
| dominant                            |                                                                                            | 0              | 0              | 47             | 52             | 1              | 0                 | 0              | 0              | 63             | 0              |
| subordinate                         |                                                                                            | 0              | 21             | 34             | 27             | 19             | 0                 | 12             | 40             | 27             | 22             |
| Trait                               | Trait state                                                                                | t <sub>1</sub> | t <sub>2</sub> | t <sub>3</sub> | t <sub>4</sub> | t <sub>5</sub> | t <sub>1</sub>    | t <sub>2</sub> | t <sub>3</sub> | t <sub>4</sub> | t <sub>5</sub> |
| Storage organs                      | presence                                                                                   | 3              | 30             | 34             | 18             | 14             | 4                 | 22             | 36             | 22             | 15             |
|                                     | absence                                                                                    | 0              | 6              | 29             | 40             | 25             | 3                 | 2              | 51             | 21             | 18             |
| Type of storage organs              | bulb (sometimes with bulbils)                                                              | 1              | 68             | 0              | 1              | 0              | 3                 | 39             | 3              | 1              | 0              |
|                                     | epigeogenous stem (rhizome)                                                                | 0              | 47             | 33             | 9              | 11             | 0                 | 37             | 39             | 9              | 15             |
|                                     | hypogeogenous stem (rhizome)                                                               | 1              | 21             | 33             | 32             | 13             | 1                 | 7              | 33             | 50             | 8              |
|                                     | persistent tap root                                                                        | 0              | 12             | 38             | 20             | 30             | 3                 | 6              | 38             | 17             | 31             |
|                                     | root tuber                                                                                 | 56             | 34             | 10             | 0              | 0              | 54                | 24             | 1              | 0              | 0              |
| Vegetative propagation              | presence                                                                                   | 4              | 34             | 33             | 17             | 12             | 5                 | 23             | 38             | 22             | 11             |
|                                     | absence                                                                                    | 0              | 5              | 38             | 30             | 27             | 0                 | 2              | 38             | 24             | 36             |
| Type of vegetative propagation      | bulb (sometimes with bulbils)                                                              | 1              | 68             | 0              | 1              | 0              | 7                 | 39             | 3              | 1              | 0              |
|                                     | epigeogenous stem (rhizome)                                                                | 0              | 47             | 33             | 9              | 11             | 0                 | 37             | 39             | 9              | 15             |
|                                     | epigeogenous stem (runner-like rhizome)                                                    | 0              | 25             | 34             | 28             | 14             | 2                 | 15             | 41             | 38             | 6              |
|                                     | hypogeogenous stem (rhizome)                                                               | 1              | 21             | 33             | 32             | 13             | 1                 | 7              | 37             | 48             | 8              |
|                                     | root shoot                                                                                 | 0              | 0              | 29             | 5              | 4              | 0                 | 0              | 50             | 1              | 6              |
|                                     | root splitter                                                                              | 0              | 0              | 75             | 14             | 12             | 0                 | 0              | 79             | 13             | 6              |
|                                     | root tuber                                                                                 | 0              | 57             | 23             | 3              | 0              | 4                 | 40             | 2              | 5              | 0              |
|                                     | runner                                                                                     | 21             | 20             | 14             | 21             | 25             | 21                | 9              | 18             | 25             | 24             |
| Plant height (cm)                   | < 20                                                                                       | 13             | 35             | 33             | 12             | 8              | 19                | 26             | 37             | 12             | 4              |
|                                     | 21-40                                                                                      | 0              | 28             | 37             | 21             | 14             | 1                 | 18             | 45             | 24             | 13             |
|                                     | 41-60                                                                                      | 0              | 28             | 31             | 22             | 20             | 0                 | 15             | 32             | 27             | 26             |
|                                     | 61-80                                                                                      | 0              | 0              | 0              | 39             | 38             | 0                 | 0              | 0              | 10             | 13             |
|                                     | 81-100                                                                                     | 0              | 0              | 40             | 3              | 0              | 0                 | 0              | 13             | 0              | 0              |
| Leaf anatomy                        | hygromorphic                                                                               | 3              | 8              | 0              | 0              | 0              | 13                | 0              | 0              | 0              | 0              |
|                                     | mesomorphic                                                                                | 5              | 30             | 34             | 16             | 15             | 6                 | 21             | 39             | 19             | 15             |
|                                     | mesomorphic/hygromorphic                                                                   | 0              | 74             | 8              | 1              | 0              | 0                 | 68             | 4              | 4              | 0              |
|                                     | scleromorphic                                                                              | 1              | 0              | 22             | 13             | 63             | 1                 | 3              | 25             | 5              | 66             |
|                                     | scleromorphic/helomorphic                                                                  | 0              | 0              | 48             | 52             | 0              | 0                 | 0              | 19             | 21             | 0              |
|                                     | scleromorphic/mesomorphic                                                                  | 0              | 32             | 33             | 26             | 8              | 0                 | 16             | 46             | 34             | 4              |
|                                     | succulent                                                                                  | 0              | 0              | 0              | 4              | 21             | 0                 | 0              | 0              | 20             | 47             |
|                                     | succulent/ hygromorphic                                                                    | 0              | 3              | 0              | 0              | 0              | 0                 | 0              | 3              | 0              | 0              |
| Leaf persistence                    | overwintering green                                                                        | 0              | 61             | 11             | 0              | 0              | 0                 | 38             | 0              | 0              | 0              |
|                                     | persistent green                                                                           | 1              | 26             | 34             | 24             | 17             | 1                 | 18             | 32             | 25             | 24             |
|                                     | spring green                                                                               | 58             | 41             | 1              | 0              | 0              | 55                | 29             | 1              | 0              | 0              |
|                                     | summer green                                                                               | 0              | 27             | 39             | 19             | 15             | 0                 | 17             | 48             | 24             | 11             |
| Type of horizontal space occupation | absent                                                                                     | 11             | 42             | 27             | 5              | 15             | 14                | 37             | 23             | 5              | 20             |
|                                     | caespitose                                                                                 | 1              | 33             | 35             | 30             | 2              | 0                 | 18             | 53             | 26             | 3              |
|                                     | caespitose and reptant                                                                     | 0              | 22             | 37             | 31             | 10             | 0                 | 13             | 32             | 48             | 7              |
|                                     | pleiocorm                                                                                  | 0              | 5              | 44             | 23             | 28             | 0                 | 0              | 47             | 20             | 33             |
|                                     | pleiocorm and reptant                                                                      | 0              | 0              | 0              | 39             | 38             | 0                 | 0              | 44             | 10             | 11             |
|                                     | prostrate                                                                                  | 0              | 0              | 3              | 3              | 3              | 5                 | 4              | 0              | 6              | 0              |
|                                     | reptant                                                                                    | 1              | 36             | 26             | 20             | 17             | 5                 | 20             | 43             | 20             | 16             |
|                                     | rosulate                                                                                   | 1              | 52             | 41             | 2              | 2              | 0                 | 30             | 29             | 3              | 0              |
| Type of vertical space occupation   | broad leaves either scattered or tightly packed along the stem (hemirosulate upright forb) | 1              | 37             | 28             | 17             | 17             | 3                 | 30             | 33             | 14             | 20             |
|                                     | broad leaves equally spaced along the stem (erosulate upright forb)                        | 0              | 6              | 41             | 20             | 33             | 0                 | 1              | 50             | 18             | 31             |
|                                     | leafy stem, narrow leaves (grass)                                                          | 0              | 20             | 40             | 33             | 7              | 0                 | 14             | 40             | 40             | 5              |
|                                     | no leafy stem, broad basal leaves (rosette forb)                                           | 1              | 55             | 41             | 2              | 1              | 1                 | 59             | 26             | 3              | 0              |
|                                     | no leafy stem, narrow basal leaves (sedge)                                                 | 51             | 46             | 3              | 0              | 0              | 69                | 10             | 0              | 0              | 0              |
| Seed weight (mg)                    | 0.01–0.20                                                                                  | 1              | 16             | 23             | 22             | 40             | 0                 | 11             | 16             | 30             | 43             |
|                                     | 0.21–0.50                                                                                  | 0              | 11             | 36             | 26             | 27             | 2                 | 13             | 39             | 21             | 27             |
|                                     | 0.51–1.00                                                                                  | 0              | 41             | 36             | 16             | 7              | 1                 | 32             | 34             | 26             | 7              |
|                                     | 1.01–2.00                                                                                  | 0              | 47             | 34             | 12             | 7              | 0                 | 41             | 46             | 9              | 4              |
|                                     | 2.01–4.00                                                                                  | 0              | 0              | 66             | 31             | 1              | 0                 | 0              | 37             | 62             | 0              |
|                                     | 4.01–10.00                                                                                 | 30             | 21             | 20             | 26             | 3              | 32                | 2              | 38             | 23             | 2              |
|                                     | > 10.00                                                                                    | 5              | 0              | 0              | 0              | 0              | 5                 | 0              | 0              | 13             | 3              |
